# Supplementary material for: Model atomistic protrusions favouring the ordering and retention of water
Source: Royal Society of Chemistry journal article supplement (doi:10.1039/c4cp00094c), 2014-01-01
Supplement: c4cp00094c1.pdf [file c4cp00094c1.pdf]

ELECTRONIC SUPPLEMENTARY INFORMATION (ESI) for Model  
Atomistic Protrusions Favouring Ordering and Retention of Water

Prithvi Raj Pandey\* and Sudip Roy

Physical Chemistry Division,

National Chemical Laboratory,

Pune-411008, India.

Tel. No. - +91 (020) 25903148, Fax No. - +91 (020) 25902636

Email: [pr.pandey@ncl.res.in](mailto:pr.pandey@ncl.res.in)

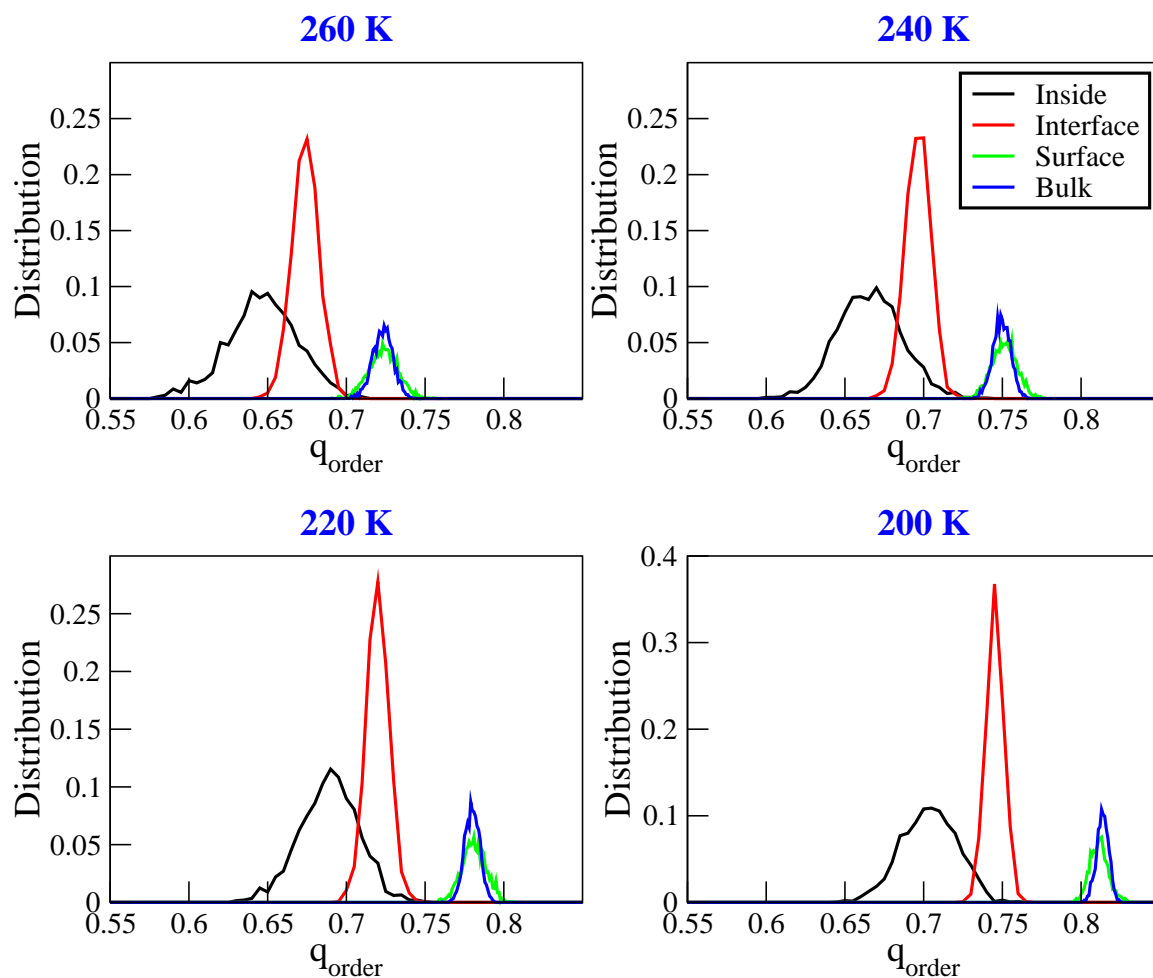

Figure 1: Distribution of  $q_{order}$  at 1 bar and different temperature. It indicates that at a particular temperature and pressure the value of  $q_{order}$  varies as inside < interface < surface  $\approx$  bulk.

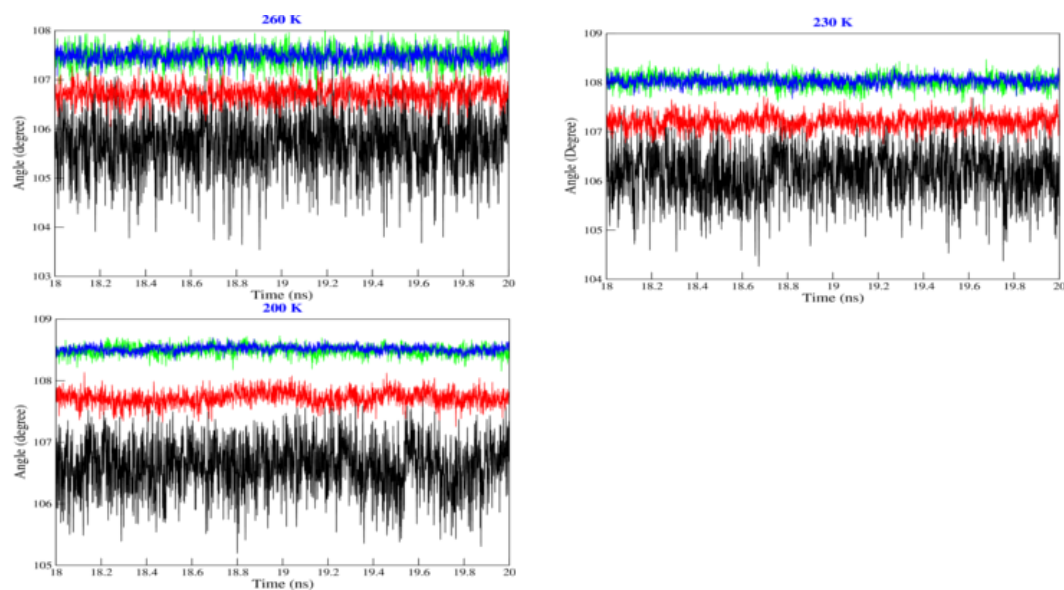

Figure 2:  $\theta_{ij}$  in  $q_{order}$  as a function of time for different temperatures and 1 bar pressure.

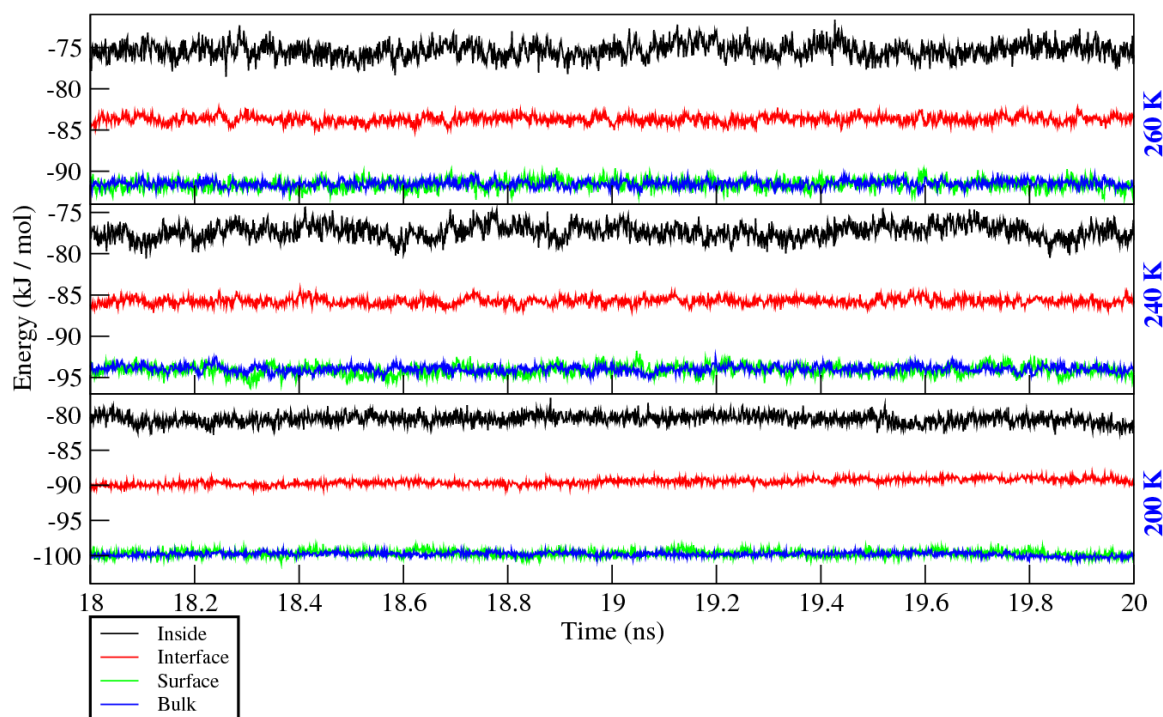

Figure 3: Plot of average nonbonded potential energy per water molecule as a function of time for different temperatures and 1 bar pressure.

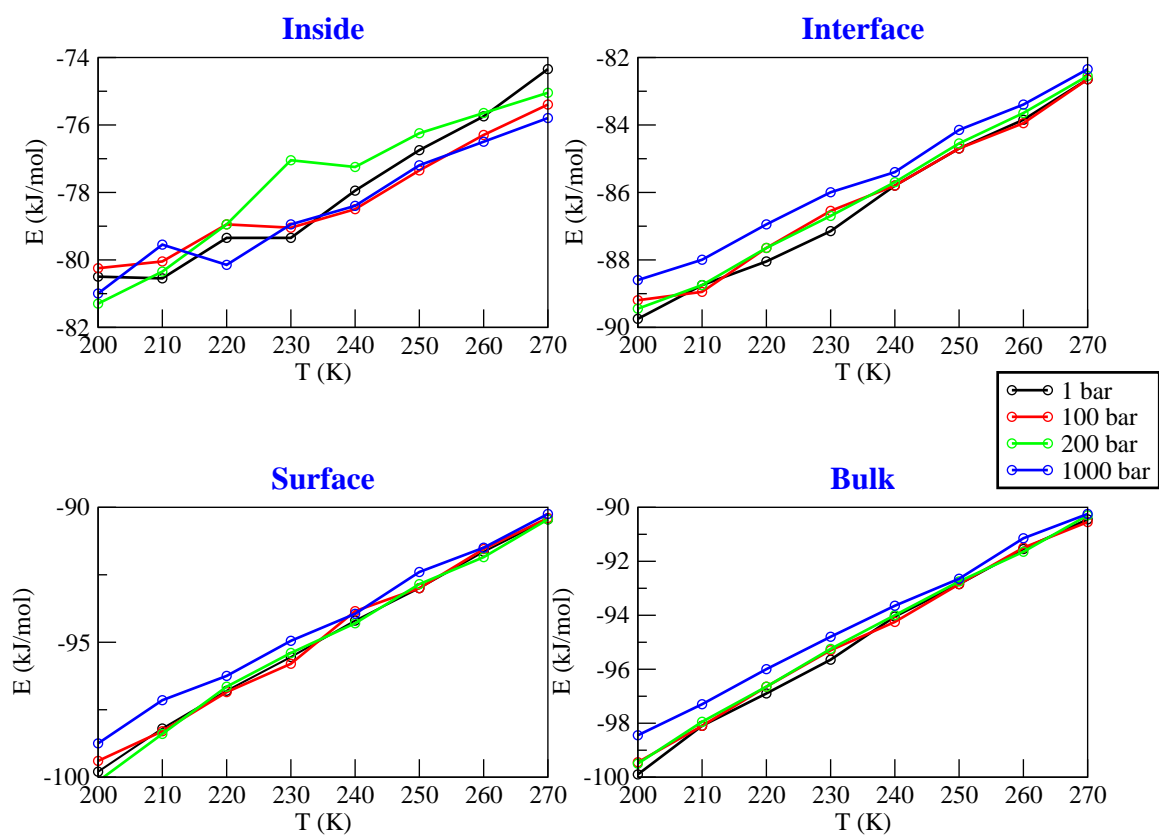

Figure 4: Peak height of potential energy distribution as a function of temperature at different pressures.

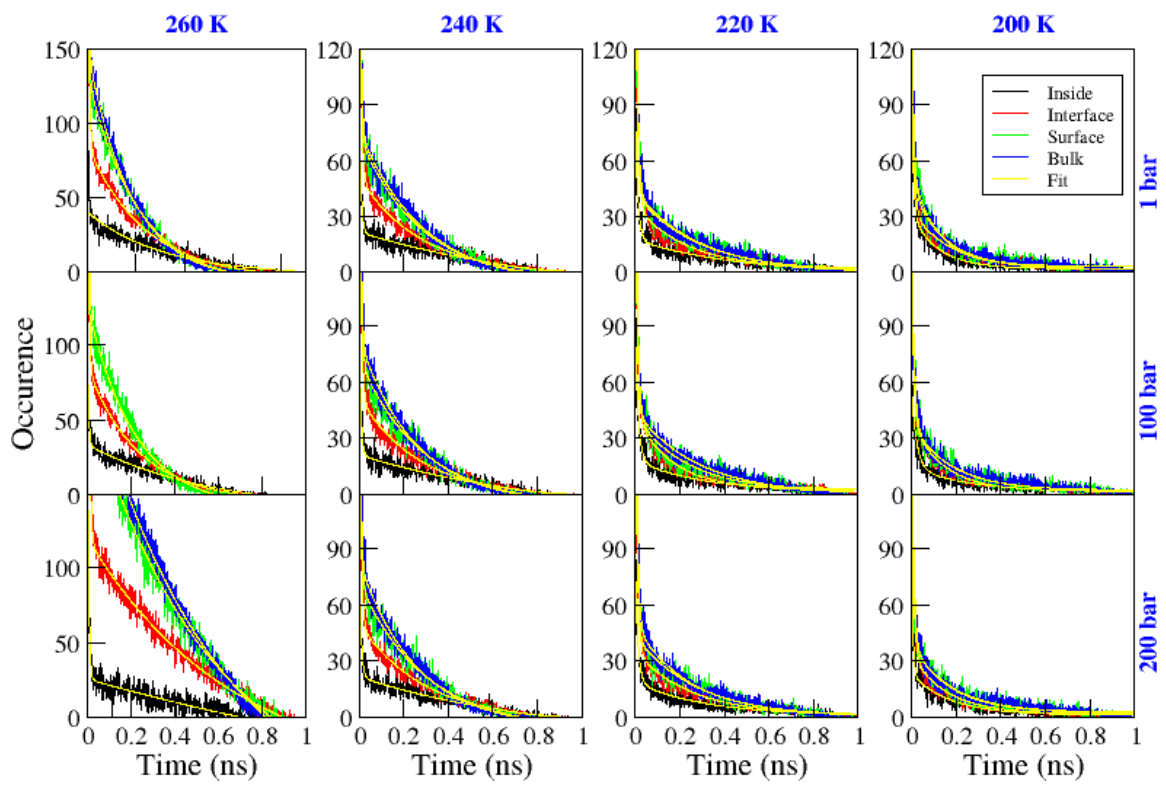

Figure 5: Fitting of residence time with bi-exponential function.

Table 1: Components of bi-exponential fitting of residence time distribution at different temperatures and pressures.

| <b>Inside</b>  |         |               |         |               | <b>Interface</b> |         |               |         |               |
|----------------|---------|---------------|---------|---------------|------------------|---------|---------------|---------|---------------|
| <b>260K</b>    | $a_s$   | $\tau_s$ (ns) | $a_s$   | $\tau_s$ (ns) | <b>260K</b>      | $a_s$   | $\tau_s$ (ns) | $a_s$   | $\tau_s$ (ns) |
| <b>1 bar</b>   | 45.5469 | 0.5736        | 91.6534 | 0.004318      | <b>1 bar</b>     | 89.4762 | 0.2385        | 225.464 | 0.005286      |
| <b>100 bar</b> | 45.3208 | 0.573         | 85.588  | 0.004546      | <b>100 bar</b>   | 89.1516 | 0.2360        | 226.788 | 0.005337      |
| <b>200 bar</b> | 103.621 | 2.478         | 222.344 | 0.005158      | <b>200 bar</b>   | 162.071 | 0.6702        | 418.232 | 0.006191      |
| <b>240K</b>    |         |               |         |               | <b>240K</b>      |         |               |         |               |
| <b>1 bar</b>   | 36.1919 | 0.9703        | 84.6565 | 0.007076      | <b>1 bar</b>     | 52.4022 | 0.2791        | 192.458 | 0.007444      |
| <b>100 bar</b> | 33.962  | 0.9169        | 77.9956 | 0.007141      | <b>100 bar</b>   | 53.3352 | 0.2705        | 184.014 | 0.007580      |
| <b>200 bar</b> | 33.2244 | 0.8365        | 78.5308 | 0.007506      | <b>200 bar</b>   | 52.1139 | 0.2938        | 178.069 | 0.00720       |
| <b>220K</b>    |         |               |         |               | <b>220K</b>      |         |               |         |               |
| <b>1 bar</b>   | 18.6233 | 0.5007        | 61.7121 | 0.01247       | <b>1 bar</b>     | 33.483  | 0.2394        | 163.719 | 0.009469      |
| <b>100 bar</b> | 16.9514 | 0.3560        | 64.9655 | 0.01443       | <b>100 bar</b>   | 38.1451 | 0.1719        | 150.357 | 0.008678      |
| <b>200 bar</b> | 17.3841 | 0.3603        | 56.745  | 0.01369       | <b>200 bar</b>   | 34.0236 | 0.2490        | 141     | 0.00928       |
| <b>200K</b>    |         |               |         |               | <b>200K</b>      |         |               |         |               |
| <b>1 bar</b>   | 28.5703 | 0.1240        | 81.3607 | 0.007949      | <b>1 bar</b>     | 30.5753 | 0.1865        | 112.991 | 0.009711      |
| <b>100 bar</b> | 13.6863 | 0.2501        | 42.2989 | 0.02141       | <b>100 bar</b>   | 36.8842 | 0.1423        | 118.033 | 0.00824       |
| <b>200 bar</b> | 21.8807 | 0.1745        | 77.3748 | 0.005857      | <b>200 bar</b>   | 30.5296 | 0.1674        | 110.773 | 0.009760      |
| <b>Surface</b> |         |               |         |               | <b>Bulk</b>      |         |               |         |               |
| <b>260K</b>    | $a_s$   | $\tau_s$ (ns) | $a_s$   | $\tau_s$ (ns) | <b>260K</b>      | $a_s$   | $\tau_s$ (ns) | $a_s$   | $\tau_s$ (ns) |
| <b>1 bar</b>   | 140.074 | 0.2062        | 283.761 | 0.003798      | <b>1 bar</b>     | 155.676 | 0.1814        | 284.609 | 0.003581      |
| <b>100 bar</b> | 135.374 | 0.2166        | 272.392 | 0.004393      | <b>100 bar</b>   | 153.632 | 0.1867        | 276.208 | 0.003420      |
| <b>200 bar</b> | 272.698 | 0.5634        | 512.935 | 0.004305      | <b>200 bar</b>   | 307.295 | 0.5681        | 495.405 | 0.004230      |
| <b>240K</b>    |         |               |         |               | <b>240K</b>      |         |               |         |               |
| <b>1 bar</b>   | 77.8862 | 0.2712        | 213.621 | 0.00582       | <b>1 bar</b>     | 83.4287 | 0.2871        | 252.992 | 0.005916      |
| <b>100 bar</b> | 77.8739 | 0.2811        | 230.353 | 0.006424      | <b>100 bar</b>   | 87.8087 | 0.2508        | 226.523 | 0.006104      |
| <b>200 bar</b> | 78.5998 | 0.2927        | 238.374 | 0.005538      | <b>200 bar</b>   | 88.347  | 0.2582        | 251.074 | 0.005069      |
| <b>220K</b>    |         |               |         |               | <b>220K</b>      |         |               |         |               |
| <b>1 bar</b>   | 42.3192 | 0.2620        | 190.485 | 0.007690      | <b>1 bar</b>     | 43.5488 | 0.2756        | 193.799 | 0.008254      |
| <b>100 bar</b> | 39.636  | 0.2371        | 162.412 | 0.009729      | <b>100 bar</b>   | 44.5122 | 0.2838        | 196.185 | 0.00811       |
| <b>200 bar</b> | 42.8219 | 0.285         | 194.775 | 0.007021      | <b>200 bar</b>   | 47.8152 | 0.2464        | 170.044 | 0.008678      |
| <b>200K</b>    |         |               |         |               | <b>200K</b>      |         |               |         |               |
| <b>1 bar</b>   | 51.3495 | 0.1148        | 130.027 | 0.006577      | <b>1 bar</b>     | 42.2377 | 0.1468        | 133.635 | 0.008365      |
| <b>100 bar</b> | 34.6056 | 0.1830        | 122.683 | 0.01069       | <b>100 bar</b>   | 35.2742 | 0.1850        | 122.917 | 0.01055       |
| <b>200 bar</b> | 36.2709 | 0.1789        | 118.605 | 0.009263      | <b>200 bar</b>   | 35.6283 | 0.1867        | 155.314 | 0.009083      |
